# Supplementary material for: 4′-Aminobenzo-18-crown-6 functionalized magnetic nanoparticles as a solid-phase extraction adsorbent for the determination of Pb2+
Source: Royal Society of Chemistry journal article supplement (doi:10.1039/c8ay02760a), 2019-01-01
Supplement: c8ay02760a1.pdf [file c8ay02760a1.pdf]

## Support Information

### **4'-aminobenzo-18-crown-6 functionalized magnetic nanoparticles as a solid-phase extraction adsorbent for determination of Pb<sup>2+</sup>**

Jing-yan Kang <sup>a,b</sup>, Wei Ha<sup>a</sup>, Hai-xia Zhang <sup>c</sup>, Yan-ping Shi<sup>a,\*</sup>

<sup>a</sup> CAS Key Laboratory of Chemistry of Northwestern Plant Resources and Key Laboratory for Natural Medicine of Gansu Province, Lanzhou Institute of Chemical Physics, Chinese Academy of Sciences, Lanzhou 730000, PR China

<sup>b</sup> University of Chinese Academy of Sciences, Beijing 100039, PR China

<sup>c</sup> College of Chemistry and Chemical Engineering, Lanzhou University, Lanzhou 730000, PR China

\*Corresponding Author

\* *shiyp@licp.cas.cn (Y.-P. Shi); Fax: +86-931 4968094;*

*Tel: +86-931-4968208.*

## **Table of content**

### **Synthesis of 4'-aminobenzo-18-crown-6**

Fig.S1. The synthesis method and characterization of AB18C6..... S-3

### **Characterization of materials**

Fig.S2. EDS of Fe<sub>3</sub>O<sub>4</sub>-NH<sub>2</sub> and Fe<sub>3</sub>O<sub>4</sub>@AB18C6..... S-5

### **Optimized of desorption conditions**

Fig.S3. Optimization of desorption condition (a) selection of desorption solvent (b) optimization of concentration of desorption solvent. ....S-5

### **Reusing times detection**

Fig.S4. Reusability of Fe<sub>3</sub>O<sub>4</sub>@AB18C6 in the MSPE extraction of Pb<sup>2+</sup> .....S-6

Fig.S5. FI-IR spectra of Fe<sub>3</sub>O<sub>4</sub>@AB18C6 after reusing.....S-6

Fig.S6. TEM of Fe<sub>3</sub>O<sub>4</sub>@AB18C6 after reusing.....S-6

### **Method validation**

Fig.S7. Linear relation of Pb<sup>2+</sup> from standard samples..... S-7

Fig.S8. Linear relation of Pb<sup>2+</sup> in apple..... S-7

Fig.S9. Linear relation of Pb<sup>2+</sup> in milk .....S-8

Fig.S10. Linear relation of Pb<sup>2+</sup> in rice.....S-8

Table1. The relevant parameter of calibration curves by MSPE of Pb<sup>2+</sup> food samples.....S-9

## Synthesis of 4'-aminobenzo-18-crown-6

4'-aminobenzo-18-crown-6 was synthesized by a catalytic hydrogenation reaction. 4'-nitrodibenzo-18-crown-6 (500 mg, 1.23 mmol) was dissolved in 30 mL methyl alcohol with stirring for 30 min. Then Pd/C catalyst (50 mg) disposed by methyl alcohol was added into the solution under stirring, the mixture solution was transferred into a glass tube of high pressure reactor and hydrogen filled into the reactor (0.5 MPa). The solution was filtered for removing the Pd/C catalyst off after stirring for 24 h, the filter liquor was gathered and methyl alcohol evaporated, the claybank, thick solution (4'-aminobenzo-18-crown-6) was obtained.  $^1\text{H}$  NMR (400MHz,  $\text{CDCl}_3$ )  $\delta$ : 6.74 (d,  $J=8.0\text{Hz}$ , 1H), 6.31 (m, 1H), 6.32-6.25 (dd,  $J_1=2.8\text{Hz}$ ,  $J_2=8.4\text{Hz}$ , 1H), 4.07-4.11 (m, 4H), 3.86-3.93 (m, 4H), 3.69-3.76 (m, 12H);  $^{13}\text{C}$  NMR ( $\text{CDCl}_3$ )  $\delta$  105.2, 141.9, 117.2, 107.6, 103.0, 70.8, 70.7, 70.6, 70.4, 70.0, 69.7, 68.8. HRMS calcd for  $\text{C}_{24}\text{H}_{18}\text{N}_2\text{O}_6\text{Na}$ : 35.1571  $[\text{M}+\text{Na}]^+$ ; found, 350.1574  $[\text{M}+\text{Na}]^+$ .

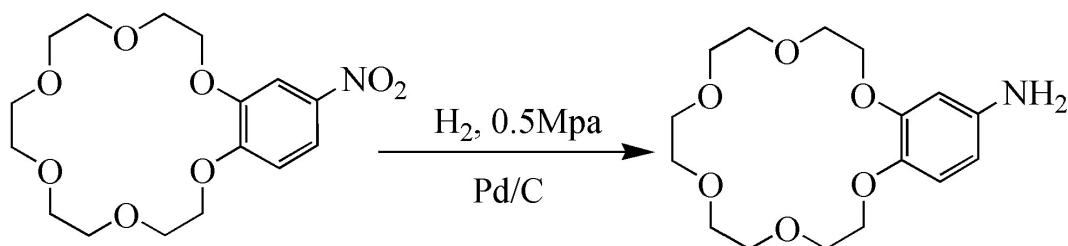

Fig. S1. Synthesis method of 4'-aminobenzo-18-crown-6

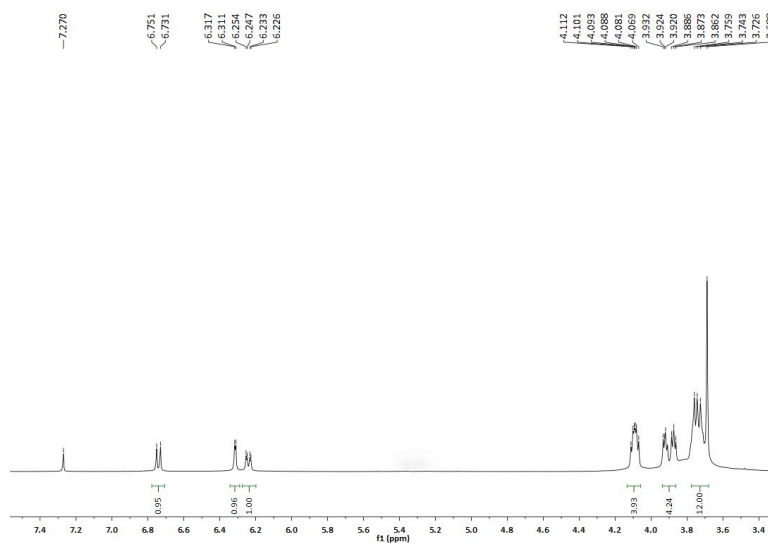

$^1\text{H}$  NMR (400MHz,  $\text{CDCl}_3$ ) spectra of AB18C6

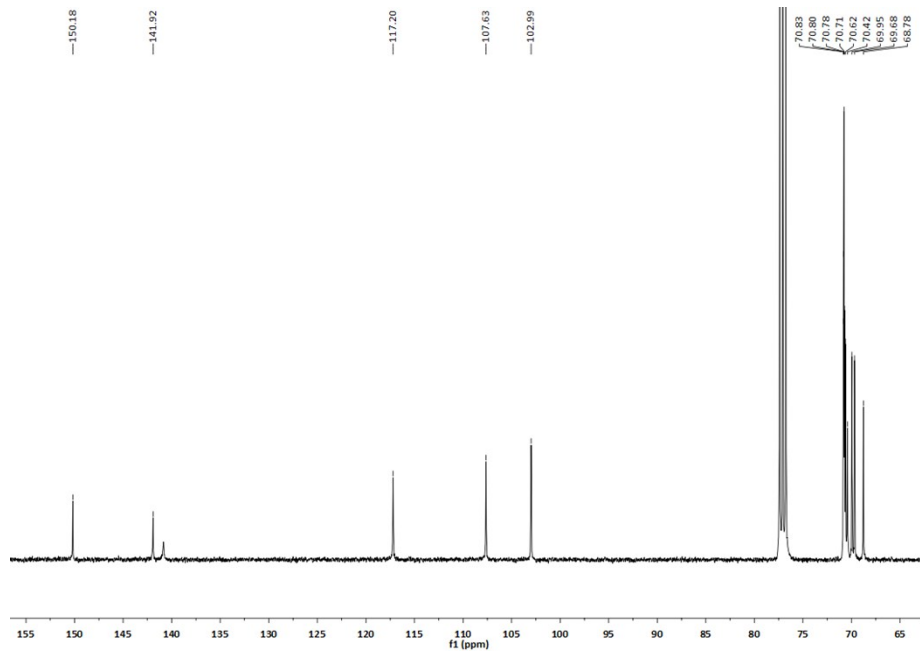

<sup>13</sup>C NMR (CDCl<sub>3</sub>) spectra of AB18C6

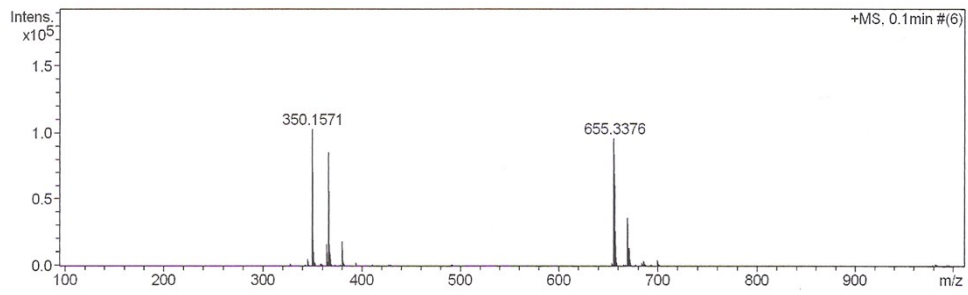

High resolution mass spectrum on positive ion mode of AB18C6

## Characterization of materials

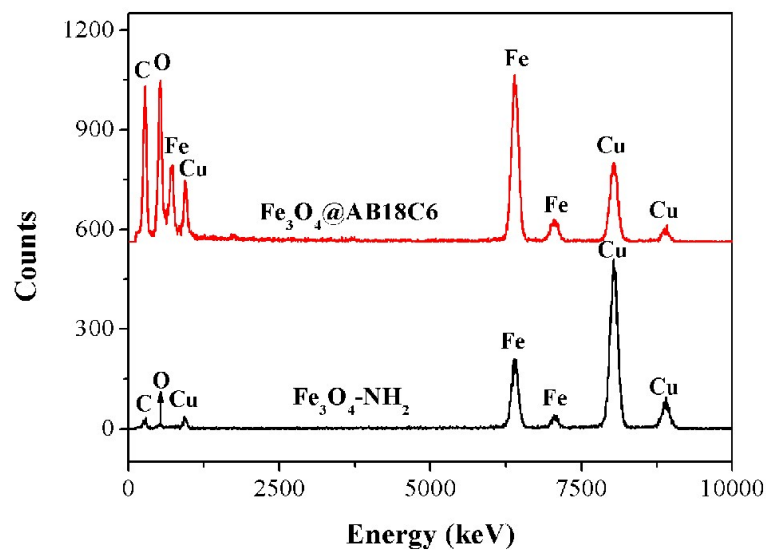

Fig.S2. EDS of  $\text{Fe}_3\text{O}_4\text{-NH}_2$  and  $\text{Fe}_3\text{O}_4@AB18C6$

## Optimized of desorption conditions

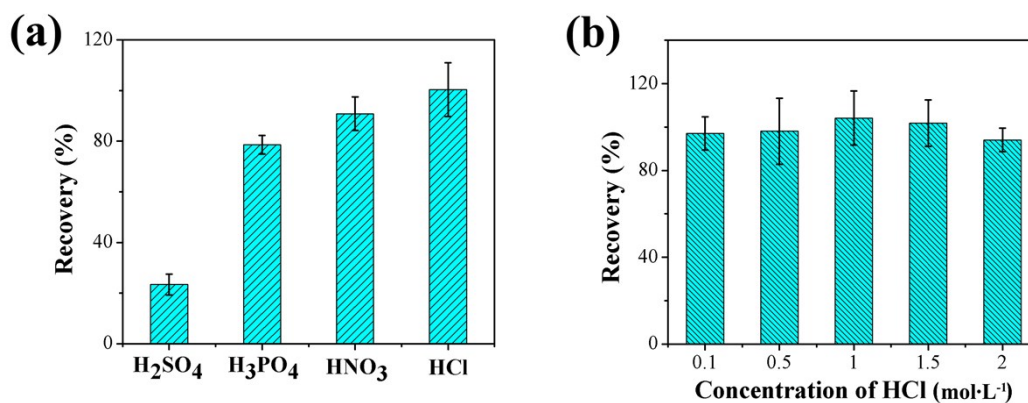

Fig.S3. Optimization of desorption condition (a) selection of desorption solvent (b) optimization of concentration of desorption solvent.

## Reusing times detection

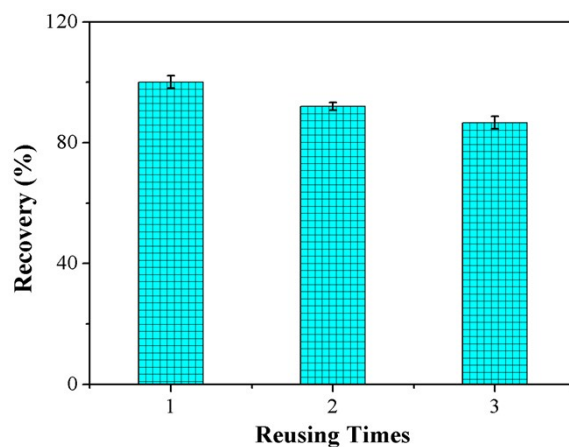

Fig.S4. Reusability of  $\text{Fe}_3\text{O}_4@\text{AB18C6}$  in the MSPE extraction of  $\text{Pb}^{2+}$

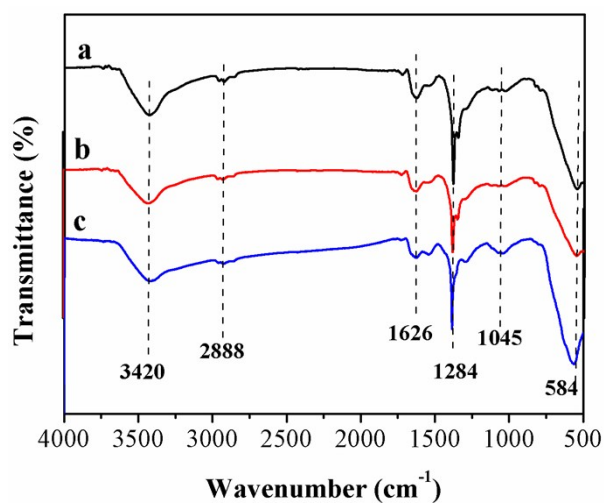

Fig.S5 FT-IR spectra of  $\text{Fe}_3\text{O}_4@\text{AB18C6}$  after reusing (a) one time (b) two times (c) three times

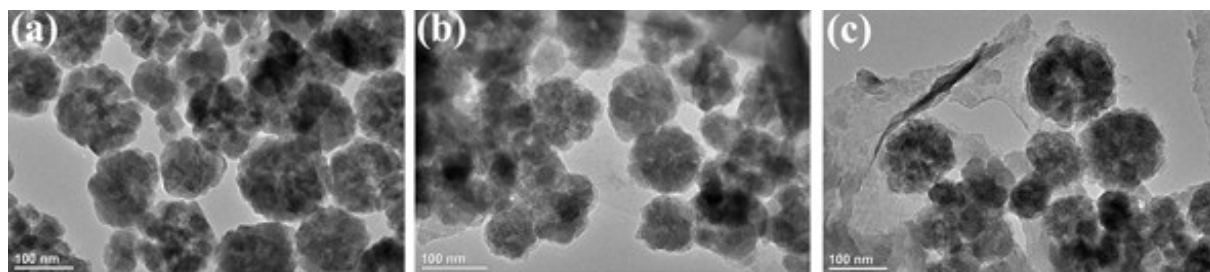

Fig.S6 TEM of  $\text{Fe}_3\text{O}_4@\text{AB18C6}$  after reusing (a) one time (b) two times (c) three times

## Method validation

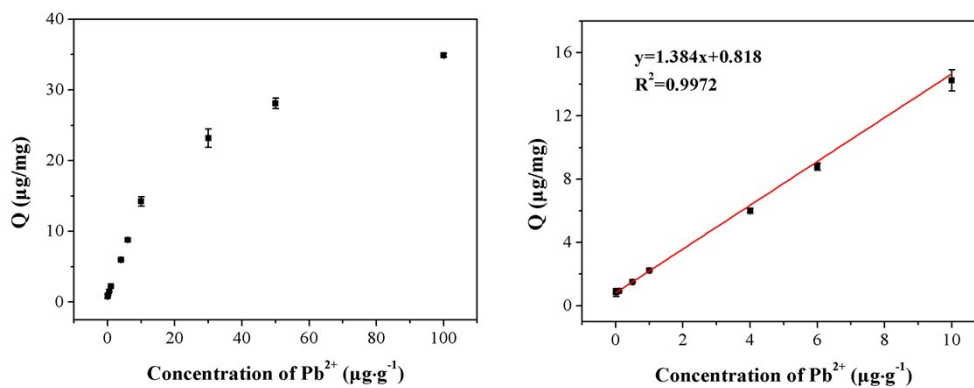

Fig.S7. Linear relation between concentration of  $\text{Pb}^{2+}$  and the absorption capacity of  $\text{Fe}_3\text{O}_4@\text{AB18C6}$

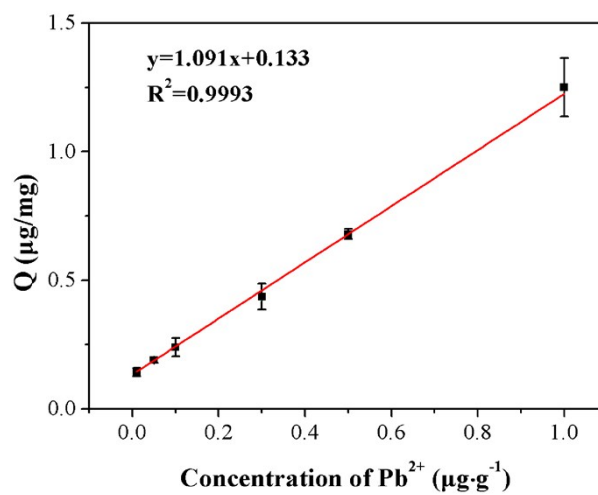

Fig.S8. Linear relation between concentration of  $\text{Pb}^{2+}$  and the absorption capacity of  $\text{Fe}_3\text{O}_4@\text{AB18C6}$  in apple

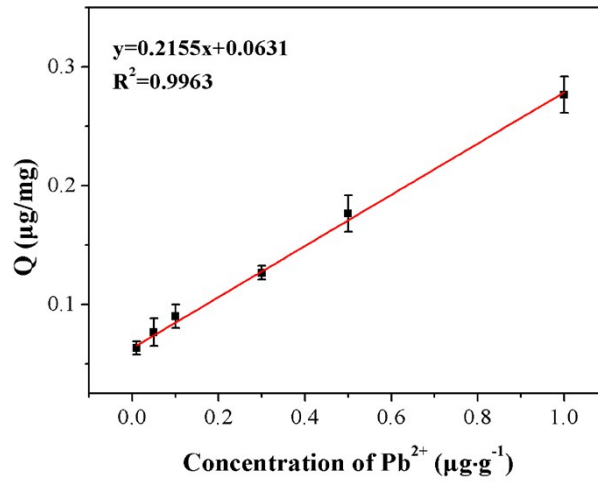

Fig.S9. Linear relation between concentration of Pb<sup>2+</sup> and the absorption capacity of Fe<sub>3</sub>O<sub>4</sub>@AB18C6 in milk

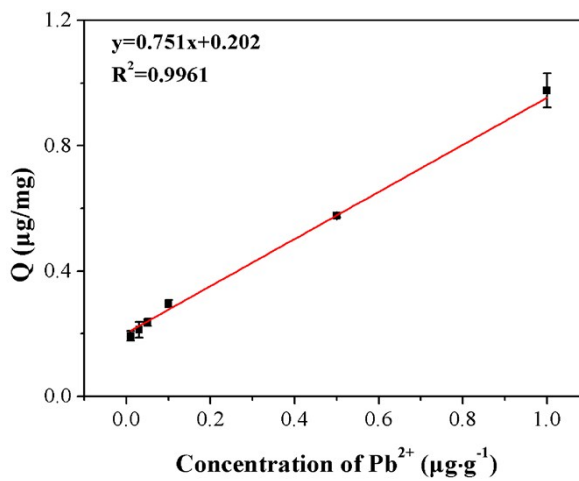

Fig.S10. Linear relation between concentration of Pb<sup>2+</sup> and the absorption capacity of Fe<sub>3</sub>O<sub>4</sub>@AB18C6 in rice



**Table S1** The relevant parameter of calibration curves by MSPE of Pb<sup>2+</sup> in apple, milk and rice

| Parameter                                       | Apple                | Milk                 | Rice                 |
|-------------------------------------------------|----------------------|----------------------|----------------------|
| Linear equation                                 | $y = 1.091x + 0.133$ | $y = 0.216x + 0.063$ | $y = 0.751x + 0.202$ |
| Linear rang ( $\mu\text{g}\cdot\text{g}^{-1}$ ) | 0.01–1               | 0.01–1               | 0.01–1               |
| Correlation coefficients ( $R^2$ )              | 0.999                | 0.996                | 0.996                |
| LOD ( $\text{ng}\cdot\text{g}^{-1}$ )           | 5.29                 | 80.1                 | 13.3                 |
| LOQ ( $\text{ng}\cdot\text{g}^{-1}$ )           | 15.8                 | 240                  | 39.9                 |
